# Supplementary material
Source: HighWire-hosted journal article supplement (https://www.jneurosci.org/content/41/23/5015)
Supplement: inline-supplementary-material-6 [file inline-supplementary-material-6.docx]

| G/R | # contacted cells | Type of contacted cell | Total # basal/ribbon contacts | Tip-to-tip contact | Tip-to-shaft contacts | No clear contact | Reached end of volume |
| --- | --- | --- | --- | --- | --- | --- | --- |
| 1 | 3 | G/R | 5 |  | 2 |  | 2 |
| 2 | 3 | G/R | 2 |  |  | 2 | 5 |
|  | 2 | B/V | 2 |  | 1 |  |  |
| 3 | 3 | G/R | 8 |  | 2 | 2 | 3 |
|  |  | B/V | 1 |  |  |  |  |
| 4 | 1 | G/R | 1 |  |  | 1 | 3 |
| 5 | 2 | G/R | 5 |  |  | 1 | 1 |
| 6 | 3 | G/R | 15 |  |  | 0 | 5 |
| 7 | 4 | G/R | 4 |  | 2 | 1 | 7 |
| 8 | 2 | G/R | 3 |  |  | 1 | 5 |
| 9 | 2 | G/R | 10/1 |  |  |  | 7 |
|  | 1 | Rod |  |  | 1 |  |  |
|  | 1 | B/V | 2 |  |  |  |  |
| 10 | 2 | G/R | 6/1 |  |  | 1 | 8 |
|  | 2 | B/V |  |  | 2 |  |  |
| 11 | 2 | G/R | 4 |  |  | 1 | 3 |
| 12 | 3 | G/R | 7/3 |  |  | 0 | 8 |
|  | 1 | B/V | 1 |  |  |  |  |
| 13 | 1 | G/R | 1 |  |  | 3 | 5 |
| 14 | 4 | G/R | 11/1 |  | 1 | 1 | 5 |
|  | 3 | B/V | 1 |  | 2 |  |  |
| 15 | 2 | G/R | 4 |  | 1 |  | 0 |
| 16 | 4 | G/R | 6/7 |  |  | 1 | 4 |
| 17 | 4 | G/R | 3 |  | 2 |  | 8 |
| 18 | 2 | G/R | 8/1 |  |  | 3 | 2 |
| 19 | 2 | G/R | 2 |  | 2 |  | 0 |
| 20 | 2 | G/R | 7/3 |  |  | 1 | 0 |
| 21 | 2 | G/R | 3 |  |  |  | 2/1 untrackable |
| 22 | 3 | G/R | 10/1 |  |  | 1 | 2 |
|  | 1 | B/V | 4 |  |  |  |  |
| 23 | 2 | G/R | 2 |  | 1 | 1 | 1 |
| 24 | 2 | G/R | 12 |  |  | 1 | 7 |
| 25 | 1 | G/R |  |  | 1 | 1 | 8 |
| 26 | 2 | G/R | 3 |  |  | 2 | 0 |
| 27 | 1 | G/R | 1 |  |  | 1 | 4 |
| 28 | 1 | G/R | 3 |  |  | 1 | 13 |
